# Supplementary material for: Prevalence and Clinical Characteristics of Bacterial Pneumonia in Neurosurgical Emergency Center Patients: A Retrospective Study Spanning 13 Years at a Tertiary Center
Source: MDPI journal article supplement (doi:10.3390/microorganisms11081992), 2023-08-02
Supplement: s1 [file s1]

**Supplementary Table S1.** Resistance rates (%) of *Klebsiella pneumoniae* to antimicrobial agents

| Antimicrobial agent            | 2009 | 2010 | 2011 | 2012 | 2013 | 2014 | 2015 | 2016 | 2017 | 2018 | 2019 | 2020 | 2021 |
|--------------------------------|------|------|------|------|------|------|------|------|------|------|------|------|------|
| <b>Amikacin</b>                | 52.2 | 63.2 | 47.8 | 45.0 | 52.0 | 70.6 | 87.9 | 73.5 | 60.0 | 73.3 | 57.6 | 42.9 | 26.8 |
| Gentamicin                     | 82.6 | 78.9 | 67.4 | 55.0 | 76.0 | 82.9 | 87.9 | 75.8 | 82.9 | 75.7 | 65.0 | 85.7 | 65.0 |
| <b>Piperacillin/tazobactam</b> | 56.5 | 68.4 | 62.5 | 60.0 | 80.0 | 74.3 | 87.9 | 72.7 | 77.1 | 90.6 | 71.4 | 87.5 | 57.5 |
| Cefazolin                      | 82.6 | 83.9 | 88.5 | 70.0 | 80.0 | 82.9 | 87.9 | 75.8 | 97.1 | 84.8 | 70.0 | 91.8 | 70.0 |
| <b>Cefuroxime</b>              | 78.3 | 89.5 | 79.2 | 67.5 | 79.2 | 82.9 | 87.9 | 75.8 | 97.1 | 90.6 | 70.0 | 89.8 | 74.4 |
| <b>Cefotaxime</b>              | 78.3 | 84.2 | 79.2 | 67.5 | 79.2 | 82.9 | 87.9 | 75.8 | 88.6 | 96.7 | 70.0 | 89.8 | 67.5 |
| Ceftazidime                    | 78.3 | 84.2 | 66.7 | 55.0 | 80.0 | 74.3 | 87.5 | 75.8 | 91.4 | 96.7 | 71.4 | 87.8 | 63.4 |
| Cefepime                       | 78.3 | 78.9 | 60.4 | 47.4 | 70.8 | 77.1 | 87.9 | 75.8 | 91.4 | 96.7 | 71.4 | 89.6 | 65.0 |
| <b>Cefoperazone/sulbactam</b>  | 39.1 | 73.7 | 62.5 | 60.0 | 79.2 | 74.3 | 87.9 | 72.7 | 88.6 | 96.7 | 71.4 | 87.8 | 62.5 |
| <b>Imipenem</b>                | 21.7 | 57.9 | 58.3 | 60.0 | 60.0 | 74.3 | 87.9 | 72.7 | 85.7 | 96.7 | 66.7 | 83.7 | 48.8 |
| <b>Meropenem</b>               | 21.7 | 52.6 | 60.9 | 60.0 | 75.0 | 74.3 | 85.7 | 70.9 | 85.7 | 96.7 | 71.4 | 83.7 | 51.2 |
| Ciprofloxacin                  | 60.9 | 84.2 | 52.1 | 47.5 | 48.0 | 74.3 | 90.9 | 72.7 | 88.6 | 76.3 | 76.2 | 93.9 | 67.5 |
| Sulfamethoxazole/trimethoprim  | 78.3 | 89.5 | 58.3 | 37.5 | 64.0 | 62.8 | 84.4 | 72.7 | 74.3 | 78.9 | 71.4 | 81.6 | 48.8 |

**Supplementary Table S2.** Resistance rates (%) of *Acinetobacter baumannii* to antimicrobial agents

| Antimicrobial agent             | 2009 | 2010 | 2011 | 2012 | 2013 | 2014 | 2015 | 2016 | 2017 | 2018 | 2019 | 2020 | 2021 |
|---------------------------------|------|------|------|------|------|------|------|------|------|------|------|------|------|
| Amikacin                        | 90.0 | 86.4 | 86.7 | 84.1 | 92.3 | 89.7 | 92.9 | 91.3 | 90.9 | 91.4 | 72.0 | 88.4 | 82.6 |
| Gentamicin                      | 90.0 | 95.4 | 91.1 | 88.6 | 96.1 | 100  | 95.2 | 91.3 | 93.9 | 91.4 | 88.0 | 97.7 | 86.9 |
| <b>Piperacillin/t azobactam</b> | 80.0 | 86.4 | 97.8 | 90.9 | 100  | 100  | 100  | 100  | 100  | 97.1 | 92.0 | 97.7 | 86.9 |
| <b>Cefoperazone /sulbactam</b>  | 65.0 | 63.6 | 62.2 | 47.7 | 53.8 | 41.4 | 57.1 | 56.5 | 60.6 | 65.7 | 72.0 | 86.0 | 69.1 |
| Ceftazidime                     | 85.0 | 86.4 | 95.6 | 84.1 | 100  | 100  | 100  | 100  | 96.7 | 100  | 92.0 | 97.7 | 86.9 |
| Cefepime                        | 90.0 | 86.4 | 95.6 | 86.4 | 95.2 | 100  | 100  | 100  | 100  | 91.4 | 84.0 | 76.7 | 52.2 |
| <b>Imipenem</b>                 | 90.0 | 77.3 | 91.1 | 90.9 | 88.5 | 100  | 100  | 97.8 | 100  | 100  | 92.0 | 93.0 | 86.9 |
| <b>Meropenem</b>                | 90.0 | 72.7 | 88.9 | 90.9 | 93.4 | 100  | 85.7 | 93.5 | 100  | 97.1 | 92.0 | 93.0 | 86.9 |
| Ciprofloxacin                   | 90.0 | 86.4 | 93.3 | 88.6 | 100  | 100  | 100  | 100  | 96.9 | 100  | 92.0 | 97.7 | 86.9 |
| Sulfamethoxazole/trimethoprim   | 90.0 | 81.8 | 93.3 | 88.6 | 92.3 | 89.7 | 100  | 93.8 | 93.9 | 91.4 | 84.0 | 88.4 | 78.3 |
| <b>Tigecycline</b>              | /    | /    | /    | /    | 69.2 | 72.4 | 69.0 | 50.0 | 33.3 | 28.6 | 28.0 | 27.9 | 26.1 |
| Polymyxin                       | /    | /    | /    | /    | /    | /    | /    | /    | /    | /    | 0    | 0    | 0    |

“/” indicates the values were not detected.

**Supplementary Table S3.** Resistance rates (%) of *Pseudomonas aeruginosa* to antimicrobial agents

| Antimicrobial agent             | 2009 | 2010 | 2011 | 2012 | 2013 | 2014 | 2015 | 2016 | 2017 | 2018 | 2019 | 2020 | 2021 |
|---------------------------------|------|------|------|------|------|------|------|------|------|------|------|------|------|
| <b>Amikacin</b>                 | 16.0 | 0    | 0    | 5.3  | 66.7 | 35.7 | 50.0 | 22.2 | 16.7 | 27.3 | 7.1  | 9.8  | 11.5 |
| Gentamicin                      | 32.0 | 4.5  | 12.5 | 5.3  | 77.8 | 35.7 | 50.0 | 22.2 | 16.7 | 27.3 | 50.0 | 34.1 | 30.8 |
| <b>Piperacillin/t azobactam</b> | 32.0 | 18.2 | 37.5 | 5.3  | 55.6 | 14.3 | 0    | 0    | 25.0 | 18.2 | 0    | 0    | 0    |
| Cefoperazone /sulbactam         | 28.0 | 18.2 | 37.5 | 5.3  | 66.7 | 50.0 | 50.0 | 22.2 | 41.7 | 27.3 | 21.4 | 36.6 | 30.8 |
| Ceftazidime                     | 24.0 | 13.6 | 20.8 | 5.3  | 44.4 | 28.6 | 16.7 | 11.1 | 33.3 | 54.5 | 7.1  | 4.9  | 11.5 |
| <b>Cefepime</b>                 | 24.0 | 13.6 | 29.2 | 5.3  | 66.7 | 42.9 | 0    | 11.1 | 41.7 | 54.5 | 7.1  | 2.4  | 7.7  |
| Aztreonam                       | 48.0 | 45.4 | 45.8 | 26.3 | 33.3 | 28.6 | 0    | 11.1 | 25.0 | 54.5 | 21.4 | 4.9  | 19.2 |
| <b>Imipenem</b>                 | 64.0 | 36.4 | 66.7 | 36.8 | 88.9 | 71.4 | 83.3 | 55.6 | 50.0 | 63.6 | 35.7 | 48.8 | 42.3 |
| <b>Meropenem</b>                | 56.0 | 50.3 | 45.8 | 26.3 | 66.7 | 57.1 | 46.7 | 55.6 | 58.3 | 54.5 | 35.7 | 41.5 | 34.6 |
| Ciprofloxacin                   | 44.0 | 27.3 | 16.7 | 15.8 | 77.8 | 57.1 | 50.0 | 33.3 | 25.0 | 45.4 | 21.4 | 34.1 | 42.3 |
| Levofloxacin                    | /    | /    | /    | /    | /    | /    | /    | /    | /    | 9.1  | 42.9 | 51.2 | 57.7 |

“/” indicates the values were not detected.

**Supplementary Table S4.** Resistance rates (%) of *Staphylococcus aureus* to antimicrobial agents

| Antimicrobial agent                  | 2009 | 2010 | 2011 | 2012 | 2013 | 2014 | 2015 | 2016 | 2017 | 2018 | 2019 | 2020 | 2021 |
|--------------------------------------|------|------|------|------|------|------|------|------|------|------|------|------|------|
| <b>MRSA*</b>                         | 61.5 | 71.4 | 80.0 | 76.5 | 70.5 | 66.7 | 87.5 | 91.3 | 90.0 | 91.7 | 100  | 83.3 | 71.4 |
| <b>Vancomycin</b>                    | 0    | 0    | 0    | 0    | 0    | 0    | 0    | 0    | 0    | 0    | 0    | 0    | 0    |
| <b>Linezolid</b>                     | 0    | 0    | 0    | 0    | 0    | 0    | 0    | 0    | 0    | 0    | 0    | 0    | 0    |
| <b>Teicoplanin</b>                   | 0    | 0    | 0    | 0    | 0    | 0    | 0    | 0    | 0    | 0    | 0    | 0    | 0    |
| <b>Rifampin</b>                      | 7.7  | 42.9 | 40.0 | 35.3 | 28.7 | 0    | 0    | 0    | 0    | 0    | 0    | 16.7 | 0    |
| <b>Sulfamethoxazole/trimethoprim</b> | 23.1 | 28.6 | 20.0 | 0    | 0    | 0    | 0    | 0    | 0    | 0    | 25.0 | 0    | 7.1  |
| Levofloxacin                         | 61.5 | 71.4 | 80.0 | 58.8 | 85.7 | 66.7 | 87.5 | 82.6 | 20.0 | 83.3 | 75.0 | 66.7 | 64.3 |
| <b>Gentamicin</b>                    | 61.5 | 71.4 | 80.0 | 64.7 | 85.7 | 50.0 | 81.2 | 86.9 | 0    | 66.7 | 75.0 | 50.0 | 35.7 |
| Clindamycin                          | 53.8 | 57.1 | 70.0 | 76.5 | 85.7 | 83.3 | 93.7 | 86.9 | 20.0 | 83.3 | 100  | 83.3 | 50.0 |
| Erythromycin                         | 53.8 | 57.1 | 70.0 | 82.3 | 85.7 | 83.3 | 93.7 | 86.9 | 20.0 | 83.3 | 100  | 83.3 | 50.0 |
| <b>Penicillin G</b>                  | 100  | 100  | 100  | 100  | 70.5 | 100  | 93.7 | 100  | 80.0 | 91.7 | 100  | 100  | 78.6 |
| Oxacillin                            | 61.5 | 71.4 | 80.0 | 70.6 | 70.5 | 66.7 | 87.5 | 91.3 | 90.0 | 75.0 | 100  | 77.8 | 64.3 |

\*MRSA: methicillin-resistant *Staphylococcus aureus*.
